# Supplementary material for: Ancient clays support contemporary biogeochemical activity in the Critical Zone
Source: Copernicus journal article supplement (doi:10.5194/egusphere-2024-1165), 2024-07-18
Supplement: Supplementary file 1 [file egusphere-2024-1165-supplement.pdf]

Supplemental material

|                                                | C/N Ratio | N mg/kg | C mg/kg | Microbial Biomass | Respiration | Exchangeable NO <sub>3</sub> <sup>-</sup> | Exchangeable NH <sub>4</sub> <sup>+</sup> | TIN    | Microbial Biomass N | Potential net N Mineralization | Potential net Nitrification | Denitrification Potential | % OM   |
|------------------------------------------------|-----------|---------|---------|-------------------|-------------|-------------------------------------------|-------------------------------------------|--------|---------------------|--------------------------------|-----------------------------|---------------------------|--------|
| <b>C/N Ratio</b>                               | 1         | 0.351   | .860**  | 0.310             | 0.362       | 0.300                                     | .389*                                     | .482** | .548**              | .626**                         | .439*                       | .381*                     | .464*  |
|                                                |           | 0.067   | 0.000   | 0.108             | 0.058       | 0.120                                     | 0.041                                     | 0.003  | 0.003               | 0.000                          | 0.019                       | 0.045                     | 0.013  |
|                                                |           | 28      | 28      | 28                | 28          | 28                                        | 28                                        | 28     | 28                  | 28                             | 28                          | 28                        | 28     |
| <b>N mg/kg</b>                                 |           | 1       | .633**  | .399*             | .393*       | .550**                                    | .528**                                    | .668** | .645**              | .456**                         | 0.127                       | 0.065                     | .714** |
|                                                |           |         | 0.000   | 0.035             | 0.039       | 0.002                                     | 0.004                                     | 0.000  | 0.000               | 0.015                          | 0.521                       | 0.742                     | 0.000  |
|                                                |           |         | 28      | 28                | 28          | 28                                        | 28                                        | 28     | 28                  | 28                             | 28                          | 28                        | 28     |
| <b>C mg/kg</b>                                 |           |         | 1       | .503**            | 0.369       | 0.360                                     | .559**                                    | .645** | .695**              | .695**                         | .435*                       | 0.293                     | .725** |
|                                                |           |         |         | 0.006             | 0.053       | 0.060                                     | 0.002                                     | 0.000  | 0.000               | 0.000                          | 0.021                       | 0.130                     | 0.000  |
|                                                |           |         |         | 28                | 28          | 28                                        | 28                                        | 28     | 28                  | 28                             | 28                          | 28                        | 28     |
| <b>Microbial Biomass C</b>                     |           |         |         | 1                 | .645**      | -0.094                                    | 0.067                                     | 0.115  | 0.131               | 0.238                          | 0.211                       | -0.016                    | .424*  |
|                                                |           |         |         |                   | 0.000       | 0.636                                     | 0.736                                     | 0.558  | 0.507               | 0.224                          | 0.281                       | 0.936                     | 0.025  |
|                                                |           |         |         |                   | 28          | 28                                        | 28                                        | 28     | 28                  | 28                             | 28                          | 28                        | 28     |
| <b>Respiration</b>                             |           |         |         |                   | 1           | 0.013                                     | 0.144                                     | 0.233  | 0.278               | 0.303                          | 0.137                       | 0.118                     | .400*  |
|                                                |           |         |         |                   |             | 0.947                                     | 0.465                                     | 0.234  | 0.153               | 0.117                          | 0.488                       | 0.551                     | 0.035  |
|                                                |           |         |         |                   |             | 28                                        | 28                                        | 28     | 28                  | 28                             | 28                          | 28                        | 28     |
| <b>Exchangeable NO<sub>3</sub><sup>-</sup></b> |           |         |         |                   |             | 1                                         | 0.306                                     | .504** | .471*               | .446*                          | 0.130                       | 0.348                     | 0.218  |
|                                                |           |         |         |                   |             |                                           | 0.113                                     | 0.006  | 0.011               | 0.017                          | 0.511                       | 0.063                     | 0.264  |
|                                                |           |         |         |                   |             |                                           | 28                                        | 28     | 28                  | 28                             | 28                          | 28                        | 28     |
| <b>Exchangeable NH<sub>4</sub><sup>+</sup></b> |           |         |         |                   |             |                                           | 1                                         | .943** | .768**              | .430*                          | 0.281                       | -0.089                    | .627** |
|                                                |           |         |         |                   |             |                                           |                                           | 0.000  | 0.000               | 0.022                          | 0.147                       | 0.654                     | 0.000  |
|                                                |           |         |         |                   |             |                                           |                                           | 28     | 28                  | 28                             | 28                          | 28                        | 28     |
| <b>TIN</b>                                     |           |         |         |                   |             |                                           |                                           | 1      | .870**              | .571**                         | 0.367                       | 0.016                     | .698** |
|                                                |           |         |         |                   |             |                                           |                                           |        | 0.000               | 0.002                          | 0.055                       | 0.934                     | 0.000  |
|                                                |           |         |         |                   |             |                                           |                                           |        | 28                  | 28                             | 28                          | 28                        | 28     |
| <b>Microbial Biomass N</b>                     |           |         |         |                   |             |                                           |                                           |        | 1                   | .746**                         | .462*                       | 0.004                     | .729** |
|                                                |           |         |         |                   |             |                                           |                                           |        |                     | 0.000                          | 0.013                       | 0.982                     | 0.000  |
|                                                |           |         |         |                   |             |                                           |                                           |        |                     | 28                             | 28                          | 28                        | 28     |
| <b>Potential Net N Mineralization</b>          |           |         |         |                   |             |                                           |                                           |        |                     | 1                              | .592**                      | 0.135                     | .498** |
|                                                |           |         |         |                   |             |                                           |                                           |        |                     |                                | 0.001                       | 0.495                     | 0.007  |
|                                                |           |         |         |                   |             |                                           |                                           |        |                     |                                | 28                          | 28                        | 28     |
| <b>Potential net Nitrification</b>             |           |         |         |                   |             |                                           |                                           |        |                     |                                | 1                           | 0.135                     | .377*  |
|                                                |           |         |         |                   |             |                                           |                                           |        |                     |                                |                             | 0.492                     | 0.048  |
|                                                |           |         |         |                   |             |                                           |                                           |        |                     |                                |                             | 28                        | 28     |
| <b>Potential Denitrification</b>               |           |         |         |                   |             |                                           |                                           |        |                     |                                |                             | 1                         | -0.047 |
|                                                |           |         |         |                   |             |                                           |                                           |        |                     |                                |                             |                           | 0.814  |
|                                                |           |         |         |                   |             |                                           |                                           |        |                     |                                |                             |                           | 28     |
| <b>% OM</b>                                    |           |         |         |                   |             |                                           |                                           |        |                     |                                |                             |                           | 1      |

\*\* . Correlation is significant at the 0.01 level.  
 \* . Correlation is significant at the 0.05 level.

Figure S1. Spearman's rho correlation of all measured variables.

| Sample / Location | Texture     | Color      | Microbial Biomass C<br>$\mu\text{g C g}^{-1}$ | Microbial Respiration<br>$\mu\text{g C g}^{-1} \text{d}^{-1}$ | Microbial Biomass N<br>$\mu\text{g N g}^{-1}$ | Potential Net N Mineralization<br>$\mu\text{g N g}^{-1} \text{d}^{-1}$ | Potential Net Nitrification<br>$\mu\text{g N g}^{-1} \text{d}^{-1}$ | Denitrification Potential<br>$\mu\text{g N g}^{-1} \text{h}^{-1}$ |
|-------------------|-------------|------------|-----------------------------------------------|---------------------------------------------------------------|-----------------------------------------------|------------------------------------------------------------------------|---------------------------------------------------------------------|-------------------------------------------------------------------|
| 1N-GP             | packed clay | red        | 112.132                                       | 3.396                                                         | 0.465                                         | -0.046                                                                 | 0.000                                                               | 5.252                                                             |
| 2N-GP             | packed clay | red        | 102.732                                       | 4.104                                                         | 0.686                                         | -0.106                                                                 | 0.000                                                               | 0.948                                                             |
| 3N-GP             | packed clay | yellow     | 97.321                                        | 7.876                                                         | 1.302                                         | 0.084                                                                  | 0.036                                                               | 0.827                                                             |
| 4N-GP             | packed clay | yellow     | 75.851                                        | 2.906                                                         | 1.201                                         | 0.006                                                                  | 0.015                                                               | -0.389                                                            |
| 5N-GP             | packed clay | yellow     | 75.674                                        | 3.110                                                         | 0.770                                         | -0.026                                                                 | -0.010                                                              | 0.536                                                             |
| 6N-GP             | sandy clay  | white      | 62.501                                        | 3.011                                                         | 0.569                                         | -0.026                                                                 | 0.000                                                               | 0.598                                                             |
| 7N-GP             | packed clay | dark gray  | 173.448                                       | 9.057                                                         | 12.744                                        | 0.238                                                                  | 0.000                                                               | 0.747                                                             |
| 8N-GP             | packed clay | dark gray  | 212.542                                       | 5.364                                                         | 17.528                                        | 0.469                                                                  | 0.000                                                               | -0.286                                                            |
| 9N-GP             | packed clay | dark gray  | 151.138                                       | 5.291                                                         | 33.209                                        | 0.347                                                                  | 0.033                                                               | -0.243                                                            |
| 10N-GP            | packed clay | dark gray  | 134.974                                       | 3.863                                                         | 26.106                                        | 0.054                                                                  | 0.000                                                               | -0.079                                                            |
| 11N-GP            | packed clay | red        | 86.812                                        | 3.759                                                         | 5.889                                         | -0.368                                                                 | 0.007                                                               | -0.283                                                            |
| 12N-GP            | packed clay | light gray | 81.445                                        | 3.319                                                         | 1.927                                         | -0.004                                                                 | 0.000                                                               | 0.119                                                             |
| 13N-GP            | packed clay | dark gray  | 60.787                                        | 2.932                                                         | 14.337                                        | 0.041                                                                  | -0.014                                                              | -0.094                                                            |
| 14N-GP            | packed clay | light gray | 67.861                                        | 2.584                                                         | 3.454                                         | 0.149                                                                  | 0.000                                                               | 0.301                                                             |
| 1N-HHW            | packed clay | light gray | 69.060                                        | 3.671                                                         | 28.177                                        | 0.732                                                                  | 0.521                                                               | 1.034                                                             |
| 2N-HHW            | packed clay | light gray | 97.301                                        | 4.293                                                         | 15.866                                        | 0.571                                                                  | 0.414                                                               | 9.720                                                             |
| 3N-HHW            | packed clay | brown      | 189.972                                       | 5.411                                                         | 22.730                                        | 1.310                                                                  | 0.242                                                               | 0.273                                                             |
| 4N-HHW            | sandy clay  | light gray | 144.766                                       | 4.026                                                         | 1.473                                         | 0.010                                                                  | -0.017                                                              | 1.322                                                             |
| 5N-HHW            | sandy clay  | light gray | 98.937                                        | 5.312                                                         | 0.889                                         | 0.023                                                                  | -0.008                                                              | 0.394                                                             |
| 6N-HHW            | packed clay | light gray | 75.907                                        | 2.675                                                         | 4.390                                         | 0.047                                                                  | 0.002                                                               | 1.389                                                             |
| 7N-HHW            | packed clay | red        | 162.892                                       | 3.401                                                         | 0.631                                         | 0.029                                                                  | 0.004                                                               | -0.683                                                            |
| 8N-HHW            | packed clay | light gray | 167.119                                       | 4.589                                                         | 14.534                                        | 0.491                                                                  | 0.458                                                               | 16.005                                                            |
| 9N-HHW            | sandy clay  | white      | 62.253                                        | 4.381                                                         | 0.309                                         | 0.007                                                                  | -0.010                                                              | 0.136                                                             |
| 1N-CSP            | sandy clay  | brown      | 54.959                                        | 2.640                                                         | 3.212                                         | 0.045                                                                  | 0.024                                                               | 0.470                                                             |
| 2N-CSP            | sandy clay  | brown      | 87.658                                        | 2.899                                                         | 0.485                                         | 0.026                                                                  | 0.017                                                               | -0.028                                                            |
| 3N-CSP            | watery clay | brown      | 251.434                                       | 3.313                                                         | 0.295                                         | 0.009                                                                  | 0.022                                                               | 0.300                                                             |
| 4N-CSP            | watery clay | brown      | 143.976                                       | 4.595                                                         | 0.391                                         | -0.048                                                                 | -0.026                                                              | 0.304                                                             |
| 5N-CSP            | sandy clay  | red        | 77.525                                        | 2.971                                                         | 0.364                                         | -0.033                                                                 | -0.012                                                              | -0.070                                                            |

Figure S2. Values of response variables measuring microbial biomass, respiration, and N cycle processes.

| Sample / Location | Texture     | Color      | Exchangeable<br>NO <sub>3</sub> <sup>-</sup> μg N g <sup>-1</sup> | Exchangeable<br>NH <sub>4</sub> <sup>+</sup> μg N g <sup>-1</sup> | Total<br>Inorganic N<br>(TIN) μg N g <sup>-1</sup> | % OM   |
|-------------------|-------------|------------|-------------------------------------------------------------------|-------------------------------------------------------------------|----------------------------------------------------|--------|
| 1N-GP             | packed clay | red        | 0.231                                                             | 1.184                                                             | 1.415                                              | 5.090  |
| 2N-GP             | packed clay | red        | 0.240                                                             | 1.469                                                             | 1.709                                              | 4.590  |
| 3N-GP             | packed clay | yellow     | 0.124                                                             | 0.841                                                             | 0.966                                              | 2.208  |
| 4N-GP             | packed clay | yellow     | 0.246                                                             | 0.560                                                             | 0.806                                              | 3.013  |
| 5N-GP             | packed clay | yellow     | 0.245                                                             | 0.828                                                             | 1.073                                              | 4.398  |
| 6N-GP             | sandy clay  | white      | 0.203                                                             | 0.547                                                             | 0.750                                              | 0.547  |
| 7N-GP             | packed clay | dark gray  | 0.283                                                             | 10.959                                                            | 11.242                                             | 15.805 |
| 8N-GP             | packed clay | dark gray  | 0.269                                                             | 14.686                                                            | 14.955                                             | 11.391 |
| 9N-GP             | packed clay | dark gray  | 0.200                                                             | 30.308                                                            | 30.509                                             | 7.106  |
| 10N-GP            | packed clay | dark gray  | 0.274                                                             | 24.531                                                            | 24.805                                             | 6.301  |
| 11N-GP            | packed clay | red        | 0.026                                                             | 8.398                                                             | 8.424                                              | 5.833  |
| 12N-GP            | packed clay | light gray | 0.260                                                             | 0.628                                                             | 0.889                                              | 5.767  |
| 13N-GP            | packed clay | dark gray  | 0.305                                                             | 14.932                                                            | 15.237                                             | 4.749  |
| 14N-GP            | packed clay | light gray | 0.231                                                             | 2.480                                                             | 2.711                                              | 4.370  |
| 1N-HHW            | packed clay | light gray | 8.914                                                             | 1.976                                                             | 10.890                                             | 7.015  |
| 2N-HHW            | packed clay | light gray | 10.950                                                            | 1.168                                                             | 12.118                                             | 10.312 |
| 3N-HHW            | packed clay | brown      | 4.130                                                             | 9.233                                                             | 13.362                                             | 4.684  |
| 4N-HHW            | sandy clay  | light gray | 0.216                                                             | 0.132                                                             | 0.348                                              | 2.247  |
| 5N-HHW            | sandy clay  | light gray | 0.207                                                             | 0.193                                                             | 0.400                                              | 1.527  |
| 6N-HHW            | packed clay | light gray | 1.821                                                             | 0.889                                                             | 2.710                                              | 1.567  |
| 7N-HHW            | packed clay | red        | 0.157                                                             | 0.103                                                             | 0.261                                              | 5.298  |
| 8N-HHW            | packed clay | light gray | 10.083                                                            | 0.597                                                             | 10.680                                             | 5.861  |
| 9N-HHW            | sandy clay  | white      | 0.205                                                             | 0.047                                                             | 0.252                                              | 0.928  |
| 1N-CSP            | sandy clay  | brown      | 0.709                                                             | 2.033                                                             | 2.743                                              | 0.988  |
| 2N-CSP            | sandy clay  | brown      | 0.059                                                             | 0.136                                                             | 0.195                                              | 2.039  |
| 3N-CSP            | watery clay | brown      | 0.038                                                             | 0.374                                                             | 0.412                                              | 1.685  |
| 4N-CSP            | watery clay | brown      | 0.283                                                             | 0.283                                                             | 0.565                                              | 1.499  |
| 5N-CSP            | sandy clay  | red        | 0.335                                                             | 0.224                                                             | 0.559                                              | 0.440  |

Figure S3. Values of response variables measuring N cycling content and organic matter.

| Sample / Location | Texture     | Color      | Total N<br>mg N kg <sup>-1</sup> | Total C<br>mg C kg <sup>-1</sup> | C/N<br>Ratio |
|-------------------|-------------|------------|----------------------------------|----------------------------------|--------------|
| 1N-GP             | packed clay | red        | 285                              | 2480                             | 9            |
| 2N-GP             | packed clay | red        | 295                              | 3440                             | 12           |
| 3N-GP             | packed clay | yellow     | 195                              | 715                              | 4            |
| 4N-GP             | packed clay | yellow     | 275                              | 620                              | 2            |
| 5N-GP             | packed clay | yellow     | 375                              | 830                              | 2            |
| 6N-GP             | sandy clay  | white      | 75                               | 595                              | 8            |
| 7N-GP             | packed clay | dark gray  | 1895                             | 54780                            | 29           |
| 8N-GP             | packed clay | dark gray  | 1235                             | 39160                            | 32           |
| 9N-GP             | packed clay | dark gray  | 1245                             | 39305                            | 32           |
| 10N-GP            | packed clay | dark gray  | 550                              | 5655                             | 10           |
| 11N-GP            | packed clay | red        | 340                              | 735                              | 2            |
| 12N-GP            | packed clay | light gray | 340                              | 760                              | 2            |
| 13N-GP            | packed clay | dark gray  | 380                              | 1080                             | 3            |
| 14N-GP            | packed clay | light gray | 335                              | 1425                             | 4            |
| 1N-HHW            | packed clay | light gray | 975                              | 17625                            | 18           |
| 2N-HHW            | packed clay | light gray | 1540                             | 33200                            | 22           |
| 3N-HHW            | packed clay | brown      | 500                              | 4150                             | 8            |
| 4N-HHW            | sandy clay  | light gray | 440                              | 4565                             | 10           |
| 5N-HHW            | sandy clay  | light gray | 85                               | 875                              | 10           |
| 6N-HHW            | packed clay | light gray | 280                              | 3130                             | 11           |
| 7N-HHW            | packed clay | red        | 205                              | 1160                             | 6            |
| 8N-HHW            | packed clay | light gray | 710                              | 8145                             | 12           |
| 9N-HHW            | sandy clay  | white      | 100                              | 705                              | 7            |
| 1N-CSP            | sandy clay  | brown      | 120                              | 1580                             | 13           |
| 2N-CSP            | sandy clay  | brown      | 140                              | 995                              | 7            |
| 3N-CSP            | watery clay | brown      | 245                              | 1445                             | 6            |
| 4N-CSP            | watery clay | brown      | 405                              | 655                              | 2            |
| 5N-CSP            | sandy clay  | red        | 570                              | 355                              | 1            |

Figure S4. Values for total N and C content and their ratio.
